# Supplementary material for: Glomerales Dominate Arbuscular Mycorrhizal Fungal Communities Associated with Spontaneous Plants in Phosphate-Rich Soils of Former Rock Phosphate Mining Sites
Source: MDPI journal article supplement (doi:10.3390/microorganisms10122406), 2022-12-05
Supplement: s1 [file s1]

# SUPPLEMENTARY DATA

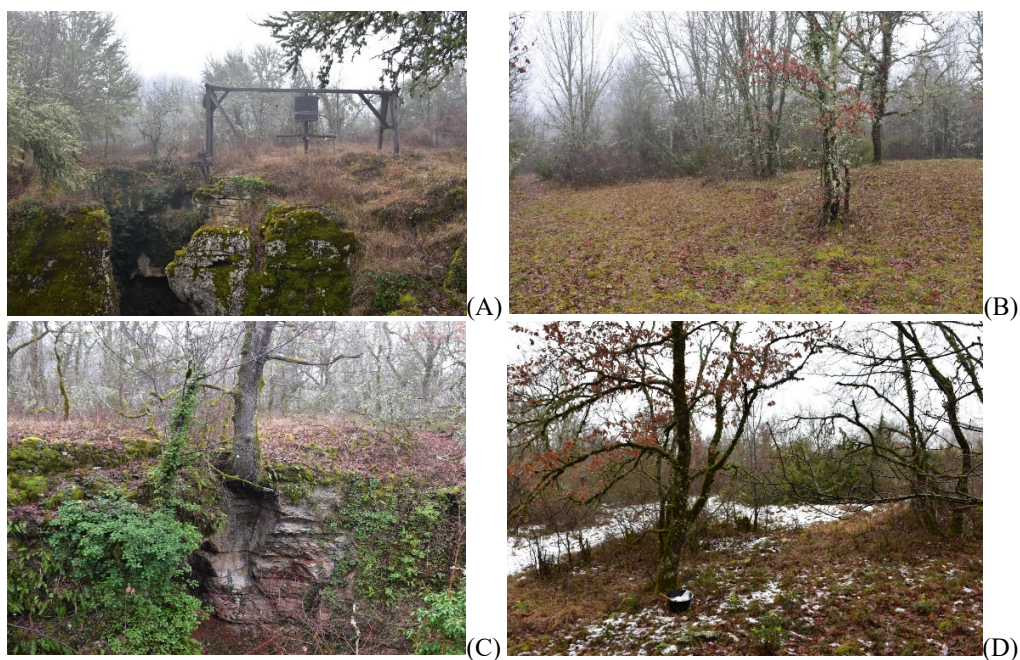

**Figure S1:** A: the remaining material from the past open-pit mines, B, C, D: Landscape in location 1, 2 and 3 respectively

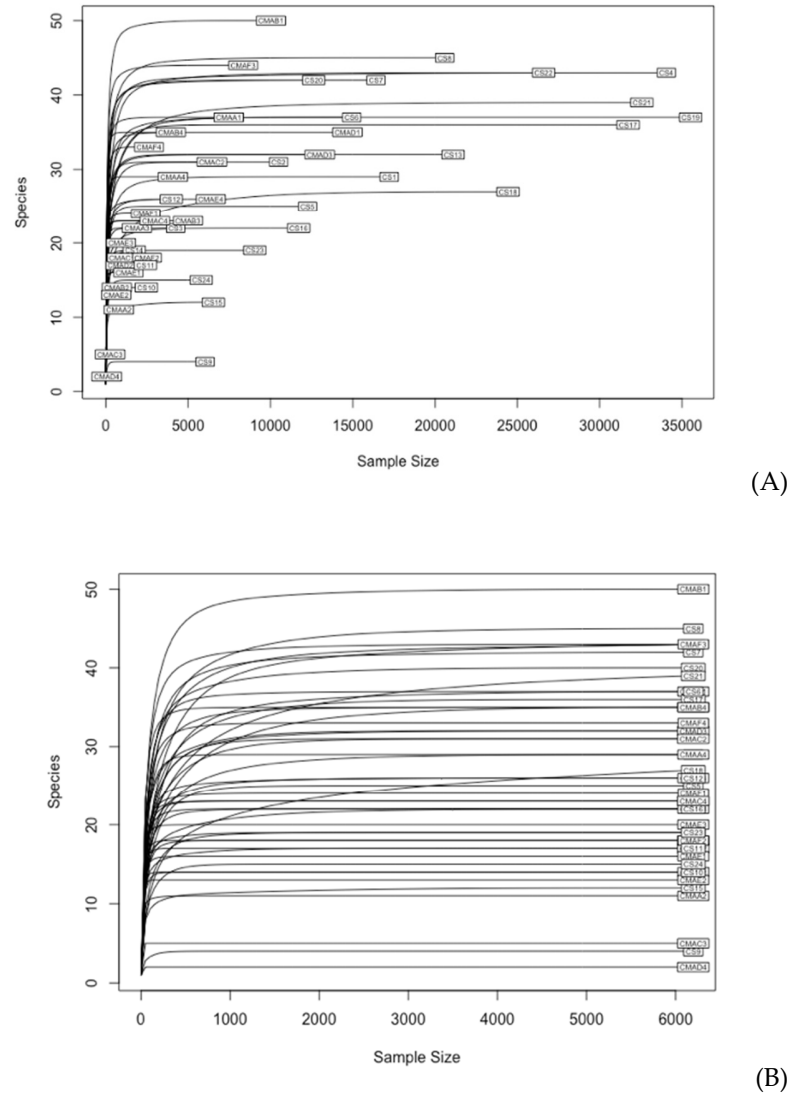

**Figure S2:** Rarefaction curves obtained from the 18S rRNA gene dataset.

(A) Curves obtained from the 3.527.278 sequences yielded after quality filtering and chimera removal (24 soil samples and 24 root samples). (B) Rarefaction curves obtained after a random resampling step, computed to compensate for the uneven sequencing efforts of different samples and to keep an adequate sequencing depth to capture most of the AMF diversity from soil and root samples. Thus, the curves were obtained for a standardized 6 000 sequences per sample.

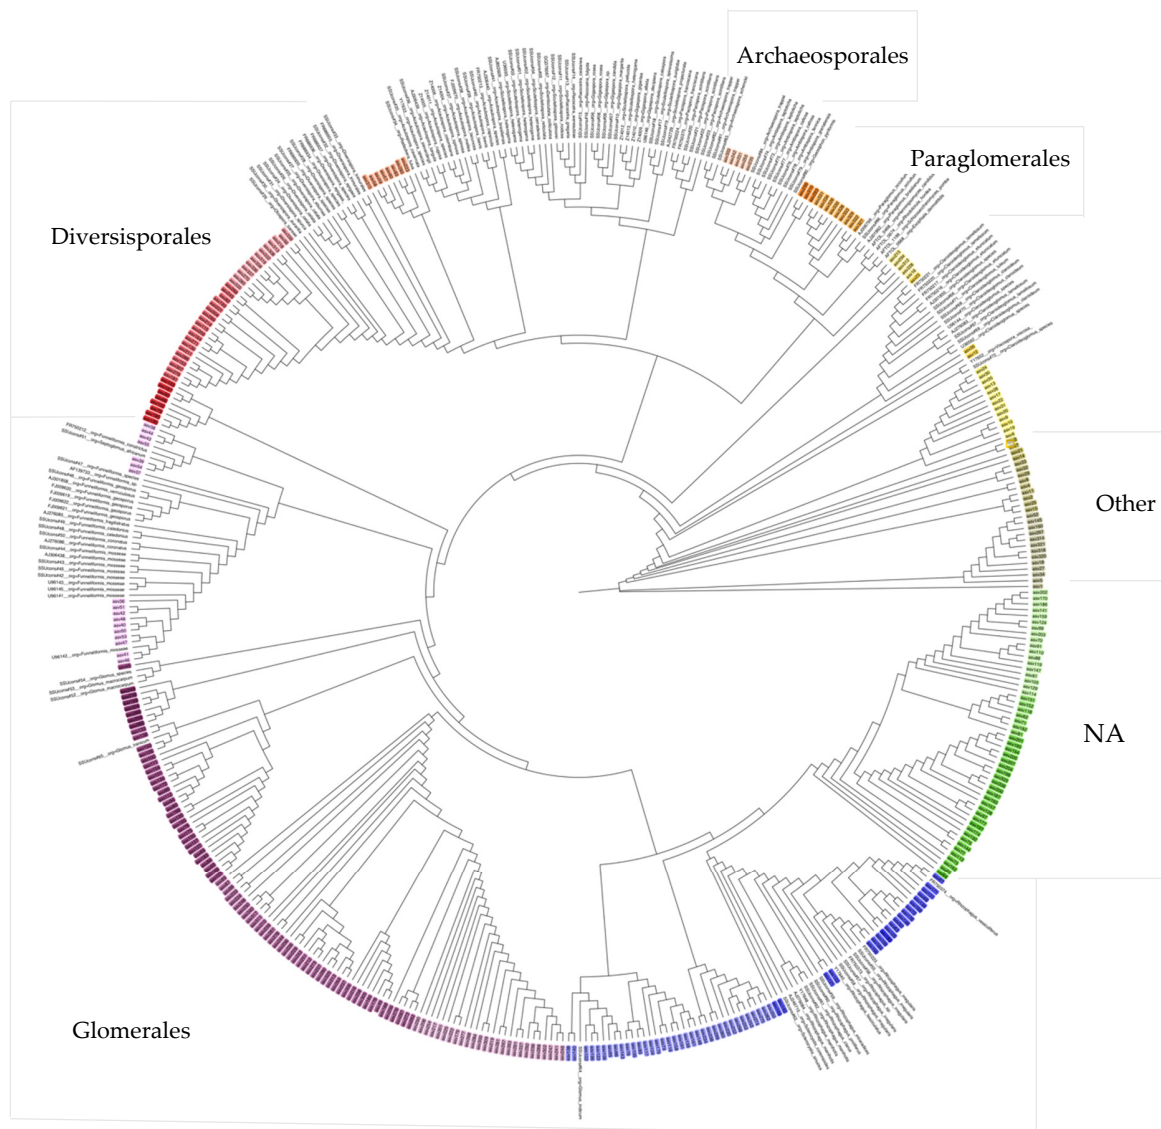

**Figure S3:** taxonomic assignment and RaxML phylogenetic tree of mycorrhizal AVSs. Different colors are used to differentiate each family assigned. Red to pink: Diversisporales; Yellow to orange: Paraglomerales; Dark orange: Archaeosporales; Green: Non-Assigned; Blue and Purple: Glomerales and Grey: Others

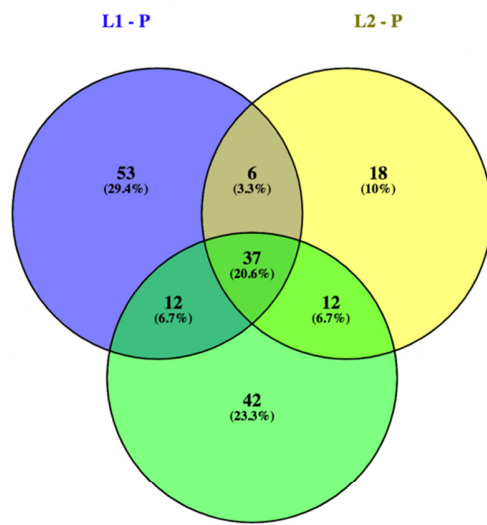

|      | ASV | Read    |
|------|-----|---------|
| L1-P | 108 | 80 213  |
| L2-P | 73  | 25 535  |
| L3-P | 103 | 110 219 |

**(A)**

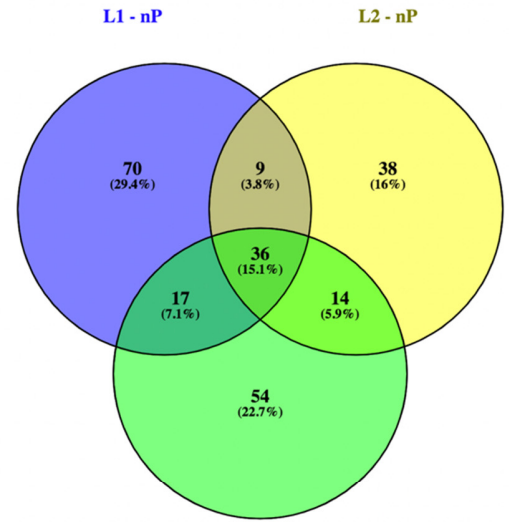

|       | ASV | Read   |
|-------|-----|--------|
| L1-nP | 132 | 83 800 |
| L2-nP | 97  | 69 677 |
| L3-nP | 121 | 89 819 |

**(B)**

**Figure S4:** Numbers of specific and shared ASVs comparing (A) the P-sites and (B) the nP sites of the three localizations: Low membership characterized by a high number of ASVs specific to one site and few overlapping ASVs

**Table S1:** Total P and available Pi contents in soils and soil physico-chemical properties sampled across 3 localizations (L1, L2 L3), each harboring "P" sites covered in the past by PR deposits or "nP" sites without deposit

|                                                                         |                  | Sites    |          |          |          |          |          |
|-------------------------------------------------------------------------|------------------|----------|----------|----------|----------|----------|----------|
|                                                                         |                  | L1 - P   | L1 - nP  | L2 - P   | L2 - nP  | L3 - P   | L3 - nP  |
| Available Pi (Olsen) (mg/Kg)                                            |                  | 46.10    | 5.04     | 339.46   | 8.09     | 192.78   | 12.82    |
| Total P (mg/Kg)                                                         |                  | 2860.0   | 1380.2   | 13,927.9 | 1067.1   | 10,739.1 | 1496.3   |
| Ratio Pi/P %                                                            |                  | 1.61     | 0.36     | 2.43     | 0.75     | 1.79     | 0.85     |
| pH(H <sub>2</sub> O)                                                    |                  | 7.058    | 6.956    | 7.552    | 6.868    | 7.324    | 7.267    |
| Granulometry fractions %                                                | Argiles          | 73.4     | 63.3     | 57.7     | 56.1     | 56.0     | 63.7     |
|                                                                         | Limons fins      | 14.8     | 20.9     | 15.4     | 22.8     | 16.1     | 13.4     |
|                                                                         | Limons grossiers | 5.6      | 9.7      | 6.5      | 12.5     | 6.4      | 6.0      |
|                                                                         | Sables fins      | 3.3      | 3.5      | 6.3      | 4.1      | 8.6      | 9.9      |
|                                                                         | Sables grossiers | 2.9      | 2.5      | 14.1     | 4.5      | 12.9     | 7.0      |
| Total carbonates CT %                                                   |                  | 0.10     | 0.10     | 0.21     | 0.10     | 0.10     | 0.10     |
| Organic matter by dry combustion (Dumas)                                | MO %             | 6.50     | 6.04     | 8.84     | 9.34     | 11.64    | 14.22    |
|                                                                         | Corg %           | 3.77     | 3.50     | 5.13     | 5.42     | 6.75     | 8.25     |
|                                                                         | N ‰              | 3.04     | 3.12     | 3.65     | 4.49     | 5.63     | 6.99     |
|                                                                         | Corg/N           | 12.42    | 11.22    | 14.04    | 12.06    | 12.00    | 11.80    |
| Absorption complex (Co(NH <sub>3</sub> ) <sub>6</sub> Cl <sub>3</sub> ) | Ca me/100g       | 25.52    | 23.48    | 24.03    | 25.01    | 31.13    | 30.50    |
|                                                                         | Mg me/100g       | 1.05     | 1.14     | 0.72     | 1.26     | 1.15     | 1.55     |
|                                                                         | K me/100g        | 0.31     | 0.23     | 0.36     | 0.32     | 0.41     | 0.42     |
|                                                                         | Na me/100g       | 0.12     | 0.13     | 0.09     | 0.13     | 0.13     | 0.12     |
|                                                                         | Al me/100g       | 0.00     | 0.01     | 0.00     | 0.00     | 0.00     | 0.00     |
|                                                                         | Mn me/100g       | 0.01     | 0.02     | 0.01     | 0.03     | 0.01     | 0.01     |
| Total element content                                                   | Fe mg/kg         | 50,426.5 | 46,905.7 | 66,132.3 | 47,679.1 | 50,843.3 | 48,395.1 |
|                                                                         | Mn mg/kg         | 548.9    | 817.3    | 1382.3   | 1407.2   | 1328.9   | 1532.8   |

|             |           |           |           |          |           |          |
|-------------|-----------|-----------|-----------|----------|-----------|----------|
| Al<br>mg/kg | 127,446.1 | 107,072.7 | 108,967.9 | 93,340.1 | 101,438.5 | 93,827.2 |
| Cu<br>mg/kg | 43.9      | 35.6      | 71.9      | 24.0     | 65.2      | 35.8     |
| Zn<br>mg/kg | 197.3     | 147.7     | 632.1     | 131.0    | 467.1     | 173.4    |
| Ca<br>mg/kg | 11,403.5  | 7896.5    | 45,554.7  | 8666.6   | 33942.1   | 14260.3  |
| Mg<br>mg/kg | 3482.7    | 3286.4    | 1989.5    | 3754.3   | 3244.5    | 3551.1   |
| K<br>mg/kg  | 11,590.6  | 11,296.7  | 8917.8    | 12,588.3 | 12,326.4  | 12,271.6 |
| Na<br>mg/kg | 1139.9    | 1589.8    | 902.7     | 2039.3   | 2133.9    | 2168.8   |

Properties mainly measured by Inductively Coupled Plasma spectrometry-atomic emission spectrometry (ICP-AES) / OM: organic matter; C<sub>org</sub>: organic carbon.

In each site, analyzed soil fraction is a composite fraction obtained by pooling subsamples collected under 12 individual plants

**Table S2 :** Distribution of number of reads in each samples.

<https://drive.google.com/drive/folders/1E8DLOBk-wnGQTGW5iCnKP3K2Z1hvoHv7?usp=sharing>

**Table S3 :** Taxonomic distribution of the ASVs identified as AMF by the Silva database and those identified by the phylogenetics analysis.

<https://drive.google.com/drive/folders/1E8DLOBk-wnGQTGW5iCnKP3K2Z1hvoHv7?usp=sharing>

**Table S4:** Taxonomic distribution patterns of the 318 ASVs identified as Glomeromycota, at the genus (A) and species (B) taxonomic rank

| A                                  |             | B                                     |             |               |
|------------------------------------|-------------|---------------------------------------|-------------|---------------|
| Taxonomic assignment to genus rank | ASV Numbers | Taxonomic assignation to species rank | ASV Numbers | Read Numbers  |
| <i>Archaeospora</i>                | 5           | <i>Archaeospora trappei</i>           | 5           | 3402          |
| <i>Claroideoglomus</i>             | 3           | <i>Claroideoglomus lamellosum</i>     | 1           | 18            |
| <i>Funneliformis</i>               | 15          | <i>Funneliformis mosseae</i>          | 10          | 12 591        |
| <i>Glomus</i>                      | 14          | <i>Glomus indicum</i>                 | 9           | 2698          |
| <i>Paraglomus</i>                  | 9           | <i>Glomus iranicum</i>                | 4           | 780           |
| <i>Rhizophagus</i>                 | 18          | <i>Rhizophagus irregularis</i>        | 2           | 123           |
| <i>Septoglomus</i>                 | 2           | <i>Rhizophagus vesiculiferus</i>      | 6           | 8033          |
|                                    |             | <i>Septoglomus africanum</i>          | 2           | 270           |
| TOTAL assigned                     | 66 (20.7%)  | TOTAL assigned                        | 39 (12.2%)  | 27 915 (6%)   |
| NA                                 | 252 (79.3%) | NA                                    | 279 (87.8%) | 431 348 (94%) |
| TOTAL                              | 318 ASVs    | TOTAL                                 | 318 ASVs    |               |

**Table S5:** ASVs with assignment up to species taxonomic level (39 ASVs)

| ASV    | Family               | Genus                  | Species                           | Read Number |
|--------|----------------------|------------------------|-----------------------------------|-------------|
| asv231 | Archaeosporaceae     | <i>Archaeospora</i>    | <i>Archaeospora_trappei</i>       | 1335        |
| asv235 | Archaeosporaceae     | <i>Archaeospora</i>    | <i>Archaeospora_trappei</i>       | 1131        |
| asv242 | Archaeosporaceae     | <i>Archaeospora</i>    | <i>Archaeospora_trappei</i>       | 579         |
| asv255 | Archaeosporaceae     | <i>Archaeospora</i>    | <i>Archaeospora_trappei</i>       | 303         |
| asv303 | Archaeosporaceae     | <i>Archaeospora</i>    | <i>Archaeospora_trappei</i>       | 36          |
| asv23  | Claroideoglomeraceae | <i>Claroideoglomus</i> | <i>Claroideoglomus_lamellosum</i> | 18          |
| asv36  | Glomeraceae          | <i>Funneliformis</i>   | <i>Funneliformis_mosseae</i>      | 11855       |
| asv40  | Glomeraceae          | <i>Funneliformis</i>   | <i>Funneliformis_mosseae</i>      | 164         |
| asv41  | Glomeraceae          | <i>Funneliformis</i>   | <i>Funneliformis_mosseae</i>      | 145         |
| asv42  | Glomeraceae          | <i>Funneliformis</i>   | <i>Funneliformis_mosseae</i>      | 138         |
| asv46  | Glomeraceae          | <i>Funneliformis</i>   | <i>Funneliformis_mosseae</i>      | 102         |
| asv47  | Glomeraceae          | <i>Funneliformis</i>   | <i>Funneliformis_mosseae</i>      | 81          |
| asv48  | Glomeraceae          | <i>Funneliformis</i>   | <i>Funneliformis_mosseae</i>      | 50          |
| asv50  | Glomeraceae          | <i>Funneliformis</i>   | <i>Funneliformis_mosseae</i>      | 34          |
| asv51  | Glomeraceae          | <i>Funneliformis</i>   | <i>Funneliformis_mosseae</i>      | 22          |
| asv53  | Glomeraceae          | <i>Funneliformis</i>   | <i>Funneliformis_mosseae</i>      | 19          |
| asv106 | Glomeraceae          | <i>Glomus</i>          | <i>Glomus_indicum</i>             | 384         |
| asv108 | Glomeraceae          | <i>Glomus</i>          | <i>Glomus_indicum</i>             | 348         |
| asv123 | Glomeraceae          | <i>Glomus</i>          | <i>Glomus_indicum</i>             | 277         |
| asv132 | Glomeraceae          | <i>Glomus</i>          | <i>Glomus_indicum</i>             | 227         |
| asv140 | Glomeraceae          | <i>Glomus</i>          | <i>Glomus_indicum</i>             | 142         |
| asv143 | Glomeraceae          | <i>Glomus</i>          | <i>Glomus_indicum</i>             | 132         |
| asv196 | Glomeraceae          | <i>Glomus</i>          | <i>Glomus_indicum</i>             | 9           |
| asv95  | Glomeraceae          | <i>Glomus</i>          | <i>Glomus_indicum</i>             | 596         |
| asv96  | Glomeraceae          | <i>Glomus</i>          | <i>Glomus_indicum</i>             | 583         |
| asv126 | Glomeraceae          | <i>Glomus</i>          | <i>Glomus_iranicum</i>            | 274         |
| asv133 | Glomeraceae          | <i>Glomus</i>          | <i>Glomus_iranicum</i>            | 225         |
| asv138 | Glomeraceae          | <i>Glomus</i>          | <i>Glomus_iranicum</i>            | 165         |
| asv150 | Glomeraceae          | <i>Glomus</i>          | <i>Glomus_iranicum</i>            | 116         |
| asv156 | Glomeraceae          | <i>Rhizophagus</i>     | <i>Rhizophagus_irregularis</i>    | 98          |
| asv184 | Glomeraceae          | <i>Rhizophagus</i>     | <i>Rhizophagus_irregularis</i>    | 25          |
| asv131 | Glomeraceae          | <i>Rhizophagus</i>     | <i>Rhizophagus_vesiculiferus</i>  | 228         |
| asv139 | Glomeraceae          | <i>Rhizophagus</i>     | <i>Rhizophagus_vesiculiferus</i>  | 147         |
| asv166 | Glomeraceae          | <i>Rhizophagus</i>     | <i>Rhizophagus_vesiculiferus</i>  | 52          |
| asv171 | Glomeraceae          | <i>Rhizophagus</i>     | <i>Rhizophagus_vesiculiferus</i>  | 43          |
| asv67  | Glomeraceae          | <i>Rhizophagus</i>     | <i>Rhizophagus_vesiculiferus</i>  | 3787        |
| asv68  | Glomeraceae          | <i>Rhizophagus</i>     | <i>Rhizophagus_vesiculiferus</i>  | 3776        |
| asv39  | Glomeraceae          | <i>Septoglomus</i>     | <i>Septoglomus_africanum</i>      | 258         |
| asv54  | Glomeraceae          | <i>Septoglomus</i>     | <i>Septoglomus_africanum</i>      | 12          |



**Table S6:** Shared ASVs (26) by the six sampling sites

| ASVs   | Family           | Genus              | Species                          | Read Number |
|--------|------------------|--------------------|----------------------------------|-------------|
| asv61  | Glomeraceae      | NA                 | NA                               | 78761       |
| asv62  | Glomeraceae      | NA                 | NA                               | 50728       |
| asv208 | Glomeraceae      | NA                 | NA                               | 38464       |
| asv209 | Diversisporaceae | NA                 | NA                               | 17775       |
| asv210 | Glomeraceae      | NA                 | NA                               | 14419       |
| asv212 | Glomeraceae      | NA                 | NA                               | 13172       |
| asv213 | Glomeraceae      | NA                 | NA                               | 12331       |
| asv214 | Diversisporaceae | NA                 | NA                               | 10116       |
| asv63  | Glomeraceae      | <i>Rhizophagus</i> | NA                               | 8551        |
| asv64  | Glomeraceae      | NA                 | NA                               | 7342        |
| asv65  | Glomeraceae      | NA                 | NA                               | 6481        |
| asv217 | Glomeraceae      | NA                 | NA                               | 6427        |
| asv67  | Glomeraceae      | <i>Rhizophagus</i> | <i>Rhizophagus vesiculiferus</i> | 3787        |
| asv68  | Glomeraceae      | <i>Rhizophagus</i> | <i>Rhizophagus vesiculiferus</i> | 3776        |
| asv69  | Glomeraceae      | NA                 | NA                               | 3288        |
| asv222 | Glomeraceae      | NA                 | NA                               | 3279        |
| asv70  | Glomeraceae      | NA                 | NA                               | 2955        |
| asv74  | Glomeraceae      | NA                 | NA                               | 2027        |
| asv226 | Glomeraceae      | NA                 | NA                               | 1992        |
| asv77  | Glomeraceae      | NA                 | NA                               | 1821        |
| asv229 | Glomeraceae      | NA                 | NA                               | 1763        |
| asv230 | Glomeraceae      | NA                 | NA                               | 1524        |
| asv237 | Glomeraceae      | NA                 | NA                               | 1119        |
| asv240 | Glomeraceae      | NA                 | NA                               | 720         |
| asv92  | Glomeraceae      | <i>Rhizophagus</i> | NA                               | 652         |
| asv97  | Glomeraceae      | NA                 | NA                               | 575         |

**Table S7:** ASVs identified after indicator species analysis

| ASV                          | Group  | p_values | Order           | Family           | Species                 | Read<br>Total | ASV also referred to<br>as: |
|------------------------------|--------|----------|-----------------|------------------|-------------------------|---------------|-----------------------------|
| P or nP group analysis       |        |          |                 |                  |                         |               |                             |
| asv131                       | nP     | 0.0492*  | Glomerales      | Glomeraceae      | <i>R. vesiculiferus</i> | 228           | nP Specific ASV             |
| asv208                       | nP     | 0.0194*  | Glomerales      | Glomeraceae      | NA                      | 38,464        | Microbial core ASV          |
| asv219                       | nP     | 0.0472*  | Glomerales      | Glomeraceae      | NA                      | 3988          | nP Specific ASV             |
| asv248                       | P      | 0.0081** | Glomerales      | Glomeraceae      | NA                      | 384           | Shared ASV                  |
| asv69                        | nP     | 0.0113*  | Glomerales      | Glomeraceae      | NA                      | 3288          | Microbial core ASV          |
| asv77                        | nP     | 0.0111*  | Glomerales      | Glomeraceae      | NA                      | 1821          | Microbial core ASV          |
| asv80                        | nP     | 0.0053** | Glomerales      | Glomeraceae      | NA                      | 1593          | Shared ASV                  |
| asv84                        | nP     | 0.0237*  | Glomerales      | Glomeraceae      | NA                      | 1040          | nP Specific ASV             |
| P, nP, S or R group analysis |        |          |                 |                  |                         |               |                             |
| asv101                       | RnP    | 0.0496*  | Glomerales      | Glomeraceae      | NA                      | 491           | nP Specific ASV             |
| asv134                       | RnP    | 0.0110*  | Glomerales      | Glomeraceae      | NA                      | 203           | nP Specific ASV             |
| asv236                       | RnP    | 0.0485*  | Glomerales      | Glomeraceae      | NA                      | 1122          | Shared ASV                  |
| asv264                       | RP     | 0.014*   | Glomerales      | Glomeraceae      | NA                      | 212           | Shared ASV                  |
| asv69                        | RnP    | 0.0024** | Glomerales      | Glomeraceae      | NA                      | 3288          | Microbial core ASV          |
| asv78                        | RnP    | 0.0017** | Glomerales      | Glomeraceae      | NA                      | 1802          | Shared ASV                  |
| asv80                        | RnP    | 0.0218*  | Glomerales      | Glomeraceae      | NA                      | 1593          | Shared ASV                  |
| asv84                        | RnP    | 0.0271*  | Glomerales      | Glomeraceae      | NA                      | 1040          | nP Specific ASV             |
| asv93                        | RnP    | 0.0041** | Glomerales      | Glomeraceae      | NA                      | 650           | Shared ASV                  |
| asv116                       | SnP    | 0.0494*  | Glomerales      | Glomeraceae      | NA                      | 309           | Shared ASV                  |
| asv208                       | SnP    | 0.0413*  | Glomerales      | Glomeraceae      | NA                      | 38,464        | Microbial core ASV          |
| asv216                       | SnP    | 0.0139*  | Glomerales      | Glomeraceae      | NA                      | 6440          | Shared ASV                  |
| asv235                       | SnP    | 0.0093** | Archaeosporales | Archaeosporaceae | <i>A. trappei</i>       | 1131          | nP Specific ASV             |
| asv255                       | SnP    | 0.0454*  | Archaeosporales | Archaeosporaceae | <i>A. trappei</i>       | 303           | nP Specific ASV             |
| asv258                       | SnP    | 0.0055** | Glomerales      | Glomeraceae      | NA                      | 267           | Shared ASV                  |
| asv66                        | SnP    | 0.0292*  | Glomerales      | Glomeraceae      | NA                      | 4400          | Shared ASV                  |
| asv76                        | SnP    | 0.0113   | Glomerales      | Glomeraceae      | NA                      | 1868          | Shared ASV                  |
| asv77                        | SnP    | 0.0045** | Glomerales      | Glomeraceae      | NA                      | 1821          | Microbial core ASV          |
| asv214                       | SP     | 0.0280*  | Diversisporales | Diversisporaceae | NA                      | 10,116        | Microbial core ASV          |
| asv88                        | SP     | 0.0420*  | Glomerales      | Glomeraceae      | NA                      | 741           | Shared ASV                  |
| asv91                        | SP     | 0.0186*  | Glomerales      | Glomeraceae      | NA                      | 653           | Shared ASV                  |
| asv97                        | SP     | 0.0095** | Glomerales      | Glomeraceae      | NA                      | 575           | Microbial core ASV          |
| asv222                       | RnP+RP | 0.0019** | Glomerales      | Glomeraceae      | NA                      | 3279          | Shared ASV                  |
| asv237                       | RnP+RP | 0.0157*  | Glomerales      | Glomeraceae      | NA                      | 1119          | Shared ASV                  |
| asv97                        | RnP+RP | 0.0296*  | Glomerales      | Glomeraceae      | NA                      | 575           | Microbial core ASV          |
| asv327                       | SnP+SP | 0.0069** | Paraglomerales  | Paraglomeraceae  | NA                      | 2200          | Shared ASV                  |
| asv61                        | SnP+SP | 0.0346   | Glomerales      | Glomeraceae      | NA                      | 78,761        | Microbial core ASV          |
| asv62                        | SnP+SP | 0.0236   | Glomerales      | Glomeraceae      | NA                      | 50,728        | Microbial core ASV          |
